# Supplementary material
Source: PubMed Central journal article supplement (PMC3674396)
Supplement: cr201364x3.pdf [file cr201364x3.pdf]

|                                  | CHO (mM) | TG (mM)  | HDL (nM) | LDL (nM) | total T3 (nM) | total T4 (nM) | FT4 (pM)  | FT3 (pM) |
|----------------------------------|----------|----------|----------|----------|---------------|---------------|-----------|----------|
| <b>LFD</b>                       | 2.9±0.1  | 1.0±0.1  | 2.3±0.1  | 0.3±0.01 | 3.3±0.1       | 256.9±9.4     | 104.9±3.4 | 35.1±1.6 |
| <b>HFD</b>                       | 3.4±0.1  | 1.5±0.04 | 3.5±0.1  | 0.3±0.01 | 2.7±0.4       | 211.7±12.9    | 79.2±6.5  | 26.0±2.9 |
| <b>HFD+BAT</b>                   | 3.4±0.1  | 1.2±0.03 | 3.3±0.2  | 0.3±0.01 | 2.8±0.1       | 243.4±16.2    | 87.1±2.1  | 27.0±1.8 |
| <b>p value (HFD vs. HFD+BAT)</b> | 0.77224  | 0.019108 | 0.779813 | 0.337978 | 0.958585      | 0.499142      | 0.597645  | 0.889102 |

**Supplementary information, Table S1** Plasma lipid and hormone profiles.

HFD was initiated immediately after BAT transplantation (HFD+BAT) at the end of the experiment (total 20 weeks) plasma lipid and hormone profiles were measured. Data are mean ± SEM. *n* = 7–8/group.
